# Supplementary material for: Knowledge about juvenile idiopathic arthritis-associated uveitis: more frequent reminders are associated with higher patient and family uveitis knowledge
Source: Springer Nature journal article supplement (doi:10.1186/s12969-021-00639-6), 2021-10-02
Supplement: MOESM1 [file 19723394]

## **Uveitis Education Survey Content**

Choose the statement that best describes you.

- I have juvenile arthritis (JIA)
- My child has juvenile arthritis (JIA)
- I do not have JIA and my child does not have JIA

Those who answered “I do not have JIA and my child does not have JIA” received a response stating “You have completed this survey. Thank you for your time”.

Remaining respondents proceeded with the survey.

1. Where are you completing this survey?
  - Rheumatology appointment
  - Ophthalmology appointment
  - Other
  
2. Please enter your age in years: \_\_\_\_\_
  
3. Please select your gender.
  - Male
  - Female
  
4. Please choose your race/ethnicity.
  - African American or Black
  - American Indian or Alaska Native
  - Asian American or Asian
  - Hispanic or Latino
  - Middle Eastern
  - Multiracial
  - Pacific Islander
  - White or Caucasian
  - Other
  
5. Which best describes where you live?
  - Midwest United States
  - Northeast United States
  - Southeast United States
  - Southwest United States
  - Northwest United States
  - Outside the United States

6. What is your highest level of education?
- Some high school
  - High school graduate
  - Some college
  - Trade/technical/vocational training
  - College graduate
  - Postgraduate degree
7. Have you heard of uveitis (an eye disease that can happen in people with arthritis)?
- Yes
  - No

The next section utilized branching logic depending on response to the initial question.

| For those who answered “I have JIA”                                                                                                                                                                                                                                                                                                                                                                                                | For those who answered “My child has JIA”                                                                                                                                                                                                                                                                                                                                                                                                  |
|------------------------------------------------------------------------------------------------------------------------------------------------------------------------------------------------------------------------------------------------------------------------------------------------------------------------------------------------------------------------------------------------------------------------------------|--------------------------------------------------------------------------------------------------------------------------------------------------------------------------------------------------------------------------------------------------------------------------------------------------------------------------------------------------------------------------------------------------------------------------------------------|
| <p>8. Have you ever been told that you have uveitis?</p> <ul style="list-style-type: none"> <li><input type="radio"/> Yes</li> <li><input type="radio"/> No</li> </ul>                                                                                                                                                                                                                                                             | <p>8. Has your child ever been told that they have uveitis?</p> <ul style="list-style-type: none"> <li><input type="radio"/> Yes</li> <li><input type="radio"/> No</li> </ul>                                                                                                                                                                                                                                                              |
| <p>9. Who treats your arthritis?</p> <ul style="list-style-type: none"> <li><input type="radio"/> Pediatric rheumatologist/nurse practitioner/physician assistant</li> <li><input type="radio"/> Adult rheumatologist/nurse practitioner/physician assistant</li> <li><input type="radio"/> Primary care provider (pediatrician or family practitioner)</li> <li><input type="radio"/> Other (If other, please specify)</li> </ul> | <p>9. Who treats your child’s arthritis?</p> <ul style="list-style-type: none"> <li><input type="radio"/> Pediatric rheumatologist/nurse practitioner/physician assistant</li> <li><input type="radio"/> Adult rheumatologist/nurse practitioner/physician assistant</li> <li><input type="radio"/> Primary care provider (pediatrician or family practitioner)</li> <li><input type="radio"/> Other (If other, please specify)</li> </ul> |
| <p>10. Have you ever had an eye exam?</p> <ul style="list-style-type: none"> <li><input type="radio"/> Yes</li> <li><input type="radio"/> No</li> </ul>                                                                                                                                                                                                                                                                            | <p>10. Has your child ever had an eye exam?</p> <ul style="list-style-type: none"> <li><input type="radio"/> Yes</li> <li><input type="radio"/> No</li> </ul>                                                                                                                                                                                                                                                                              |
| <p>11. Do you know if your eye exams are up to date?</p> <ul style="list-style-type: none"> <li><input type="radio"/> Yes</li> <li><input type="radio"/> No</li> <li><input type="radio"/> I don’t know</li> </ul>                                                                                                                                                                                                                 | <p>11. Do you know if you child’s eye exams are up to date?</p> <ul style="list-style-type: none"> <li><input type="radio"/> Yes</li> <li><input type="radio"/> No</li> <li><input type="radio"/> I don’t know</li> </ul>                                                                                                                                                                                                                  |
| <p>12. How often are you supposed to get your eyes checked?</p> <ul style="list-style-type: none"> <li><input type="radio"/> Every 3-4 months</li> <li><input type="radio"/> Every 6 months</li> </ul>                                                                                                                                                                                                                             | <p>12. How often are you supposed to get your child’s eyes checked?</p> <ul style="list-style-type: none"> <li><input type="radio"/> Every 3-4 months</li> <li><input type="radio"/> Every 6 months</li> </ul>                                                                                                                                                                                                                             |

|                                                                                                                                                                                                                                                                                  |                                                                                                                                                                                                                                                                                                  |
|----------------------------------------------------------------------------------------------------------------------------------------------------------------------------------------------------------------------------------------------------------------------------------|--------------------------------------------------------------------------------------------------------------------------------------------------------------------------------------------------------------------------------------------------------------------------------------------------|
| <ul style="list-style-type: none"> <li><input type="radio"/> Every 12 months</li> <li><input type="radio"/> I don't know</li> </ul>                                                                                                                                              | <ul style="list-style-type: none"> <li><input type="radio"/> Every 12 months</li> <li><input type="radio"/> I don't know</li> </ul>                                                                                                                                                              |
| <p>13. At your arthritis visit, does your doctor remind you when your next eye exam is due?</p> <ul style="list-style-type: none"> <li><input type="radio"/> Yes, at every visit</li> <li><input type="radio"/> Yes, at some visits</li> <li><input type="radio"/> No</li> </ul> | <p>13. At your child's arthritis visit, does your doctor remind you when your child's next eye exam is due?</p> <ul style="list-style-type: none"> <li><input type="radio"/> Yes, at every visit</li> <li><input type="radio"/> Yes, at some visits</li> <li><input type="radio"/> No</li> </ul> |

14. Did you know that uveitis can cause cataracts (clouding of the lens)?

- Yes
- No

15. Did you know that uveitis can cause glaucoma (eye damage from high pressure)?

- Yes
- No

16. Did you know that uveitis can cause blindness?

- Yes
- No

17. Did you know that children with arthritis can get uveitis even when their arthritis is controlled?

- Yes
- No

18. Did you know that children with arthritis need eye screening even if they have no symptoms?

- Yes
- No

19. Did you know that children with arthritis need eye exams even if they are no longer on medications for arthritis?

- Yes
- No

This slit lamp is needed for a full eye exam to look for uveitis

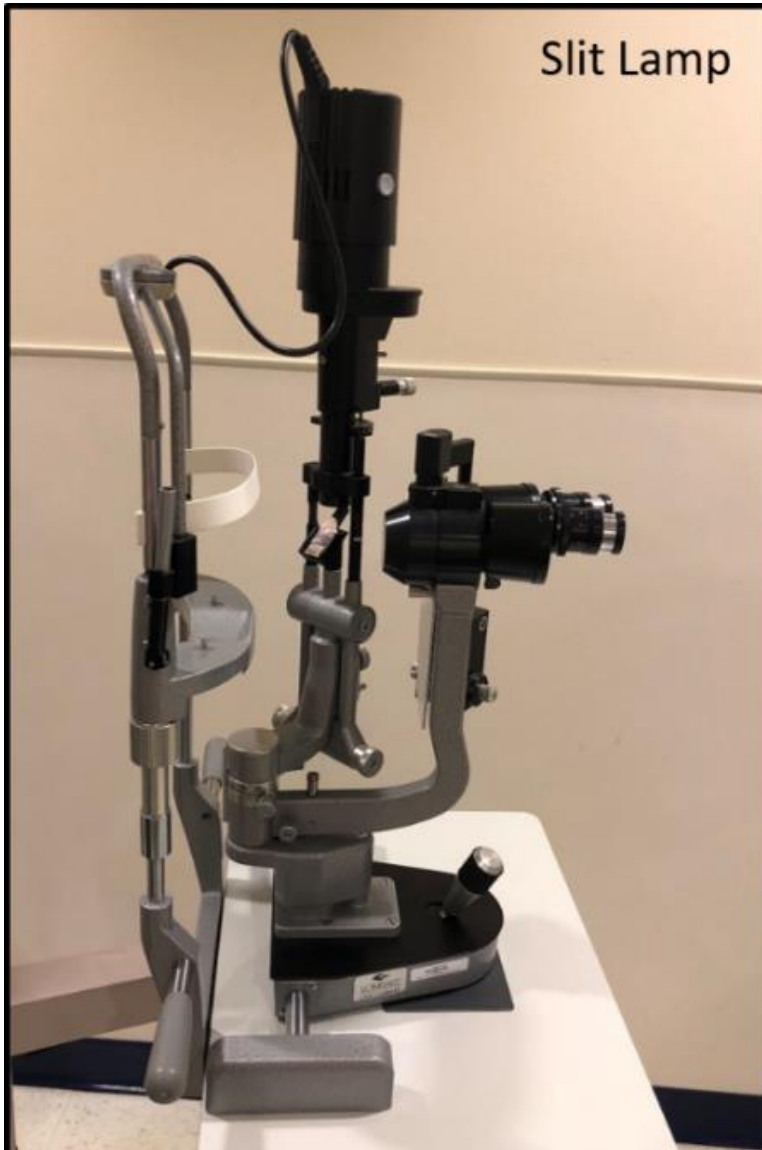

20. Did you know the slit lamp is needed for a full eye exam for uveitis?

- Yes
- No

An eye pressure check, as shown in this picture, is needed for a full eye exam to look for uveitis.

Examples of Tools Used to Check Eye Pressure

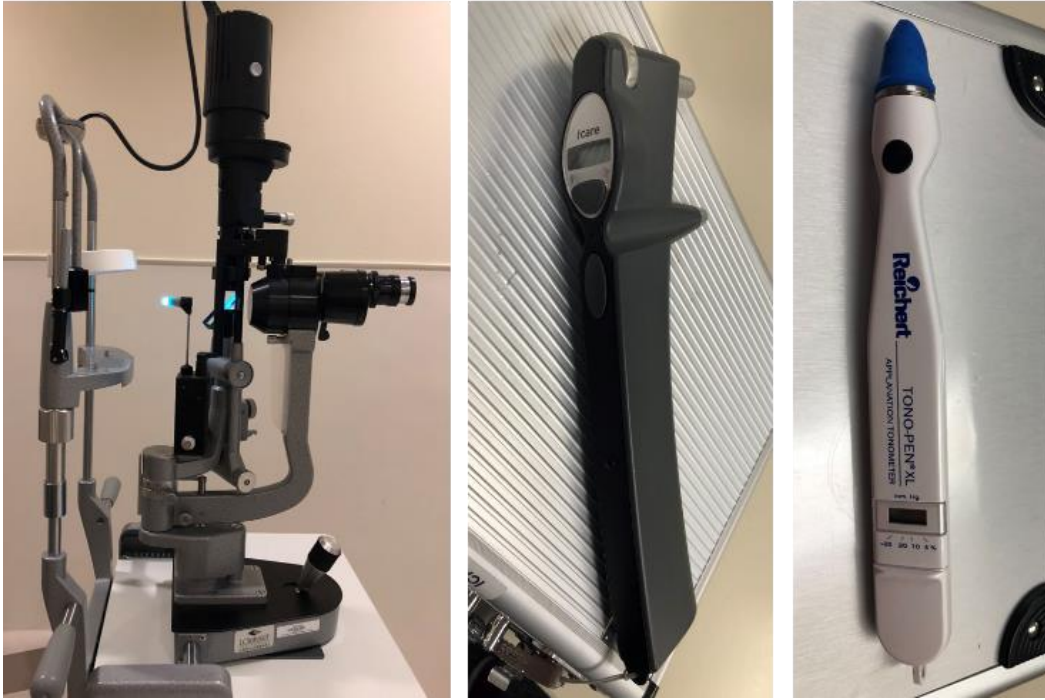

21. Did you know that an eye pressure check is needed for a full exam to look for uveitis?
- Yes
  - No
